# Supplementary material for: Selective spectral absorption of nanofibers for color-preserving daytime radiative cooling
Source: Royal Society of Chemistry journal article supplement (doi:10.1039/d3mh00391d), 2023-01-01
Supplement: d3mh00391d1.pdf [file d3mh00391d1.pdf]

## *Supporting Information*

### **Selective Spectral Absorption of Nanofibers for Color-Preserving Daytime Radiative Cooling**

Xiangshun Li <sup>a</sup>, Huilin Xu <sup>a</sup>, Yuchen Yang <sup>a</sup>, Faxue Li, <sup>a</sup> Seeram Ramakrishna <sup>b</sup>,  
Jianyong Yu <sup>c</sup>, Dongxiao Ji <sup>a,\*</sup>, Xiaohong Qin <sup>a,\*</sup>

<sup>a</sup>Key Laboratory of Textile Science & Technology, Ministry Education, College of Textiles, Donghua University, 2999 North Renmin Road, Songjiang, Shanghai, 201620, China.

<sup>b</sup>Department of Mechanical Engineering, National University of Singapore, Singapore 119260, Singapore.

<sup>c</sup>Innovation Center for Textile Science and Technology, Donghua University, Shanghai 201620, China.

#### **Corresponding Authors:**

E-mails: [jidongxiao@hotmail.com](mailto:jidongxiao@hotmail.com) (D. Ji),

E-mails: [xhqin@dhu.edu.cn](mailto:xhqin@dhu.edu.cn) (X. Qin),

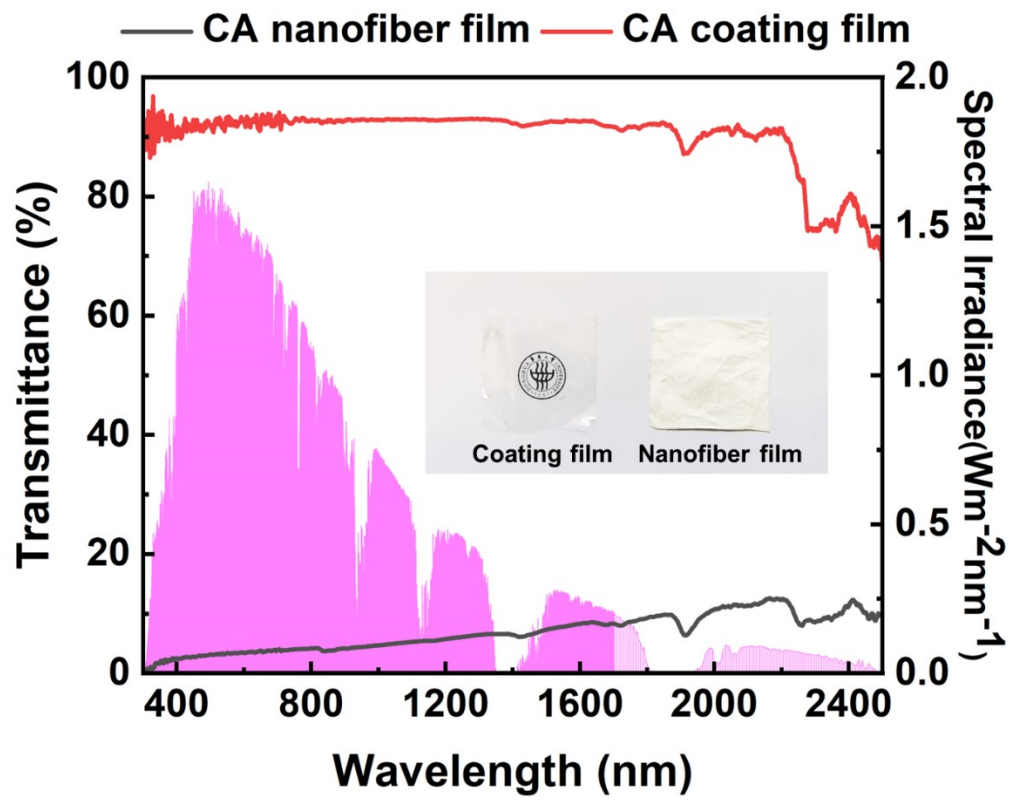

Fig. S1 Comparison of solar transmittance between CA nanofiber and CA film.

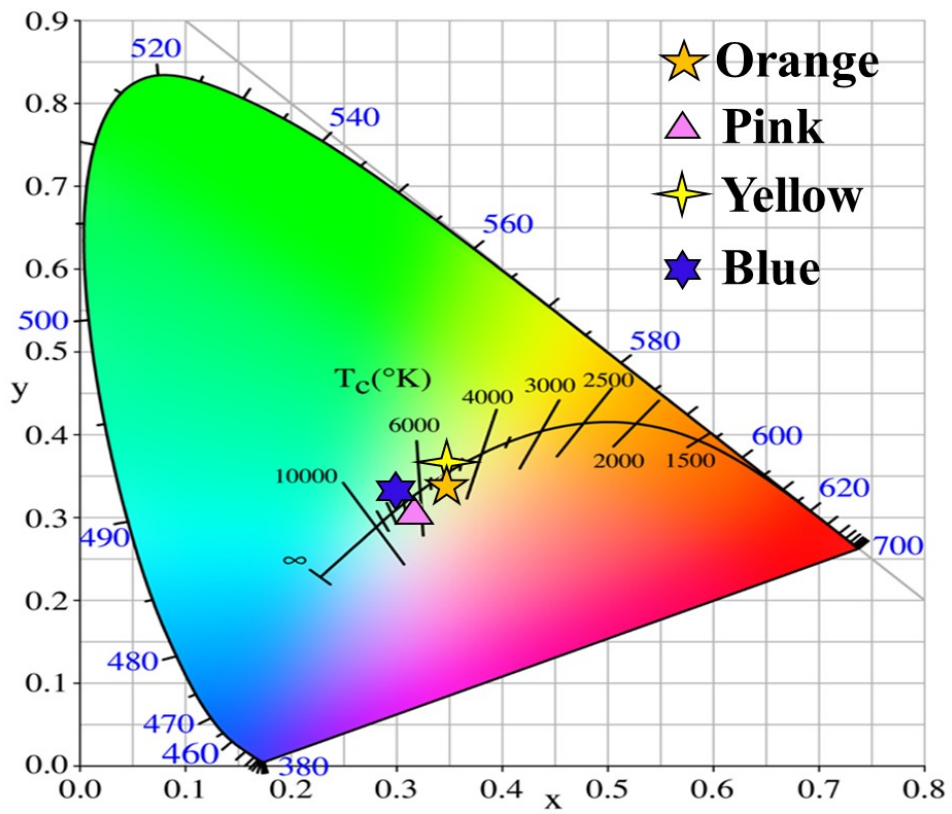

**Fig. S2** The CIE chromaticity coordinates of the CA NF CSDRCs.

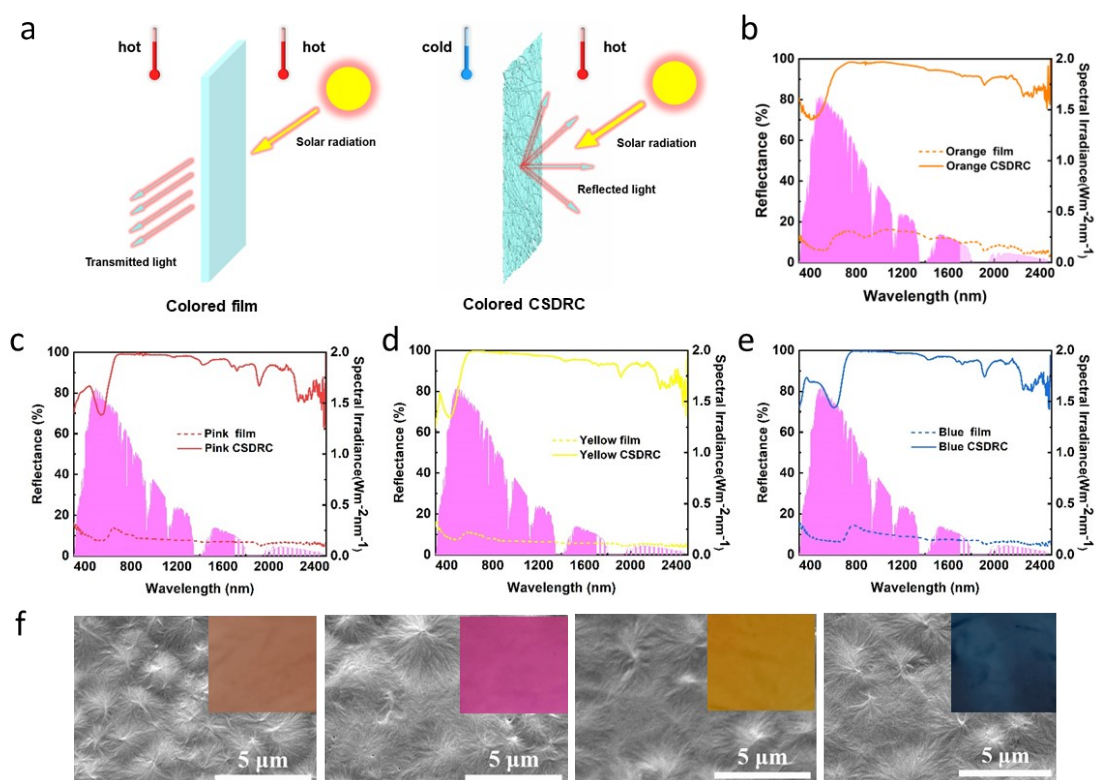

**Fig. S3** (a) Schematic illustration of the solar radiation transmitted effect of CA NF CSDRC and CA film. (b ~ e) Comparison of solar reflectance between various colors CA NF CSDRCs and CA films. (f) SEM images of colored CA film, the photograph is embedded in the corresponding images.

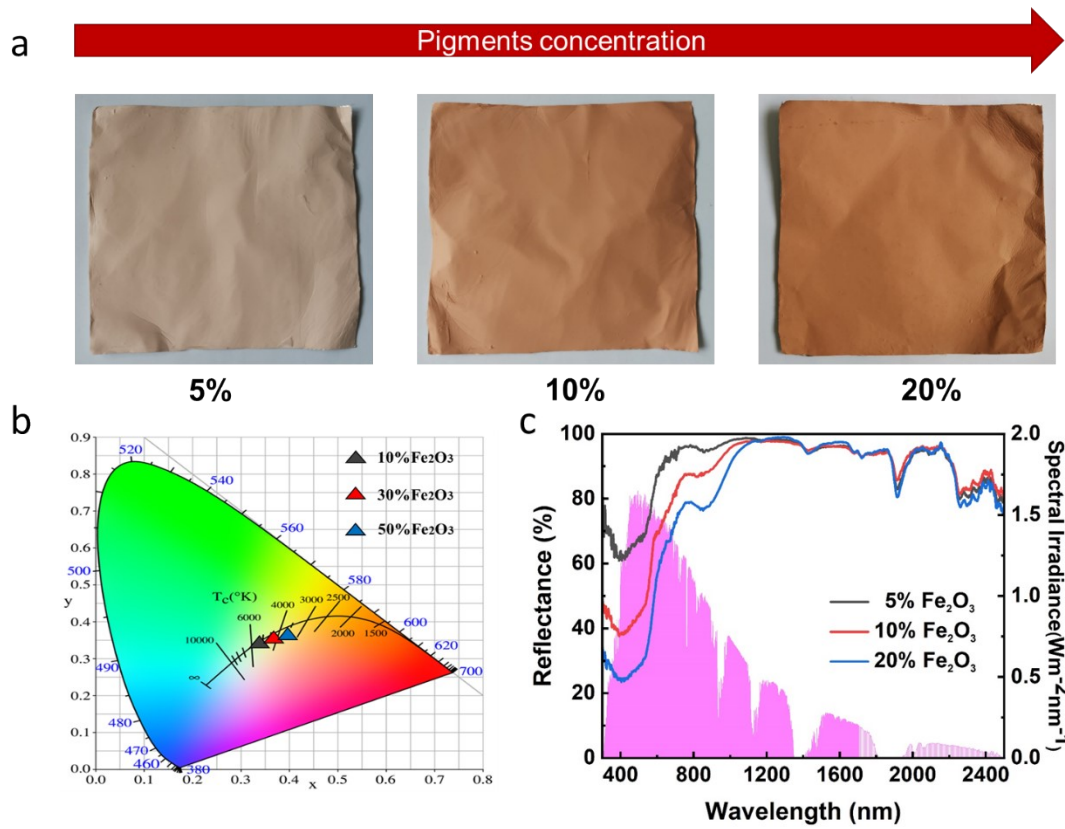

**Fig. S4** (a) Photo images of orange CSDRC containing 5% ~ 20% $\text{Fe}_2\text{O}_3$ . (b) The CIE chromaticity coordinates of the orange CSDRC with various concentrations of  $\text{Fe}_2\text{O}_3$ . (c) Reflectance spectra of orange CSDRC in the solar region.

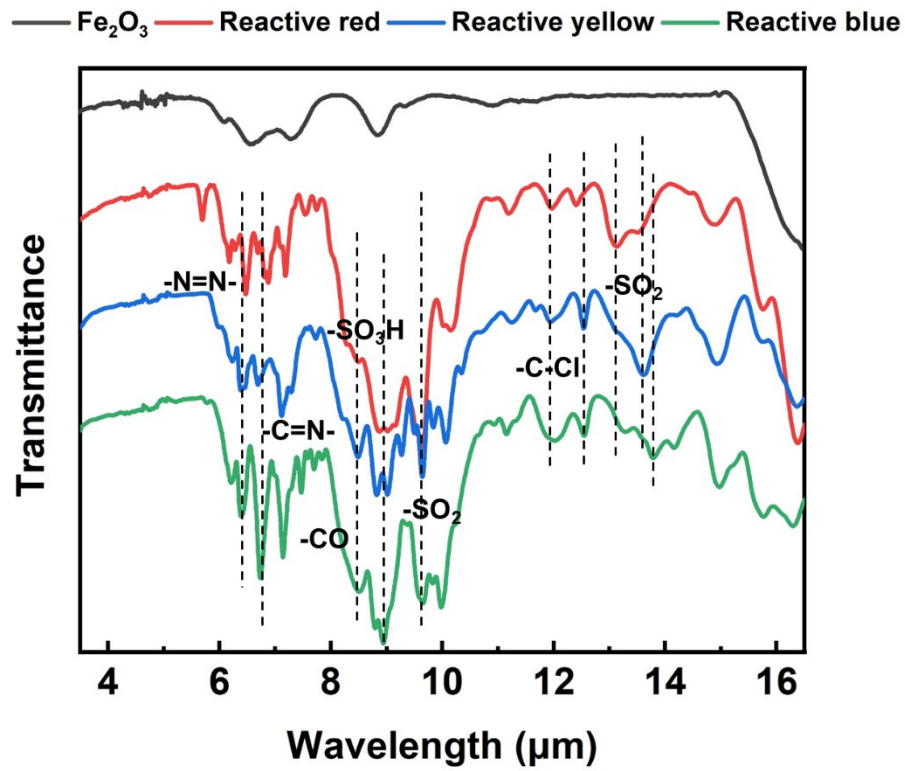

Fig. S5 IR spectrum of nano Fe<sub>2</sub>O<sub>3</sub> pigment and reactive pink, yellow and blue dyes

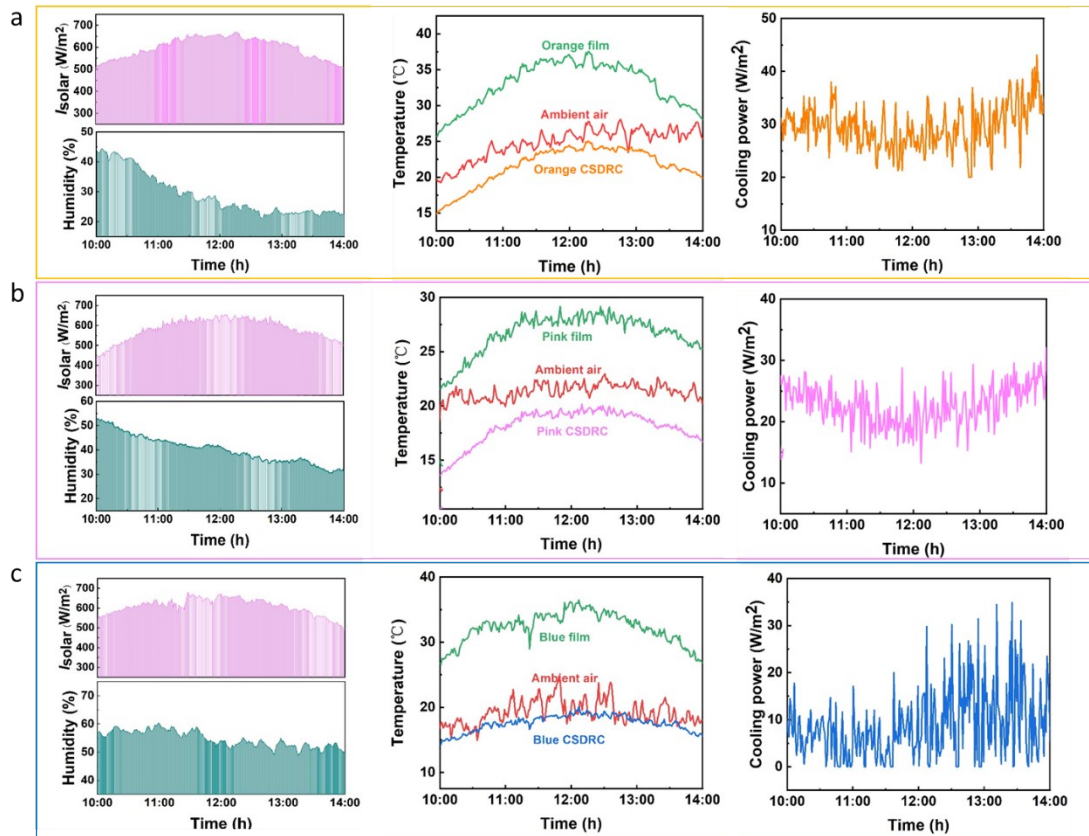

**Fig. S6** Real-time monitoring temperature curve of (a) orange CSDRC, (b) pink CSDRC and (c) blue CSDRC in the outdoor test in Shanghai, China (Nov. 2022).

### The comparison of cooling performance

We compared the cooling performance of CA NF CSDRC with recently reported colored daytime radiative coolers, founding that the daytime cooling capability of CA NF CSDRC is prominent due to the high NIR reflectance. Owing to no VIS absorption, the solar reflectance of the colored cooler in the Ref.7 is more than 95%, therefore the cooling effect is most obvious compared with other coolers. The Details of previous works are displayed in Table S3.

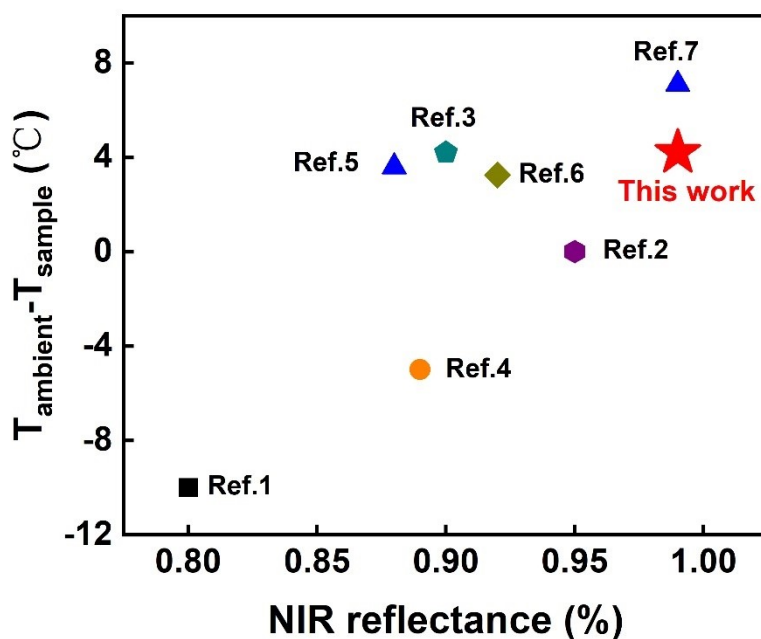

**Fig. S7** Cooling temperature of recently reported colored daytime radiative coolers and the CA NF CSDRC in this work.



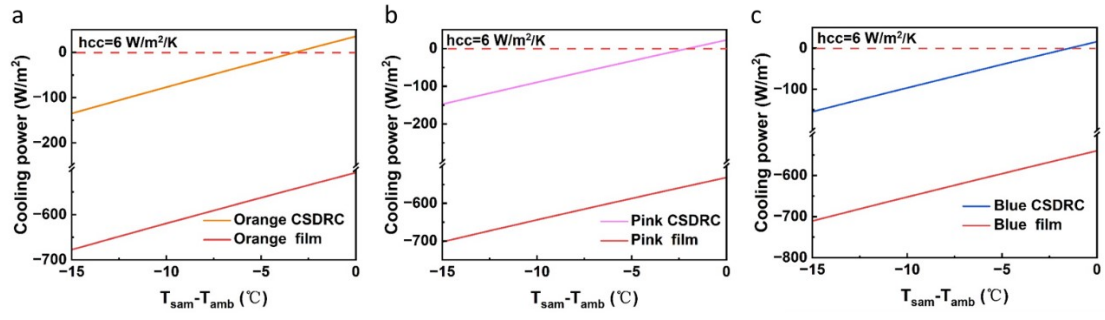

**Fig. S8** The comparison of cooling power of (a) orange CSDRC, (b) pink CSDRC and (c) blue CSDRC and coating film ( $h_{cc} = 6 \text{ W/m}^2/\text{K}$ ).

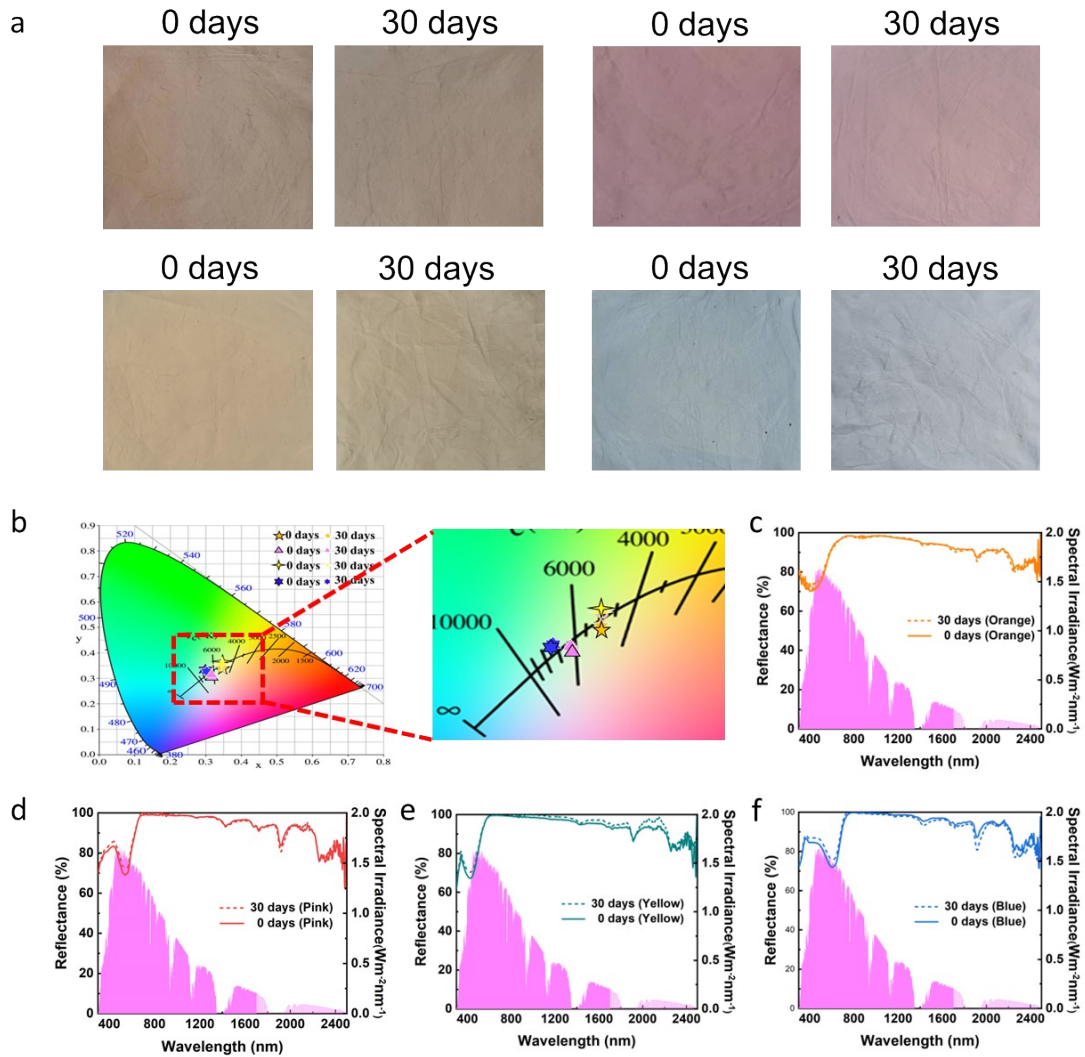

**Fig. S9** (a) The photo picture and (b) the CIE chromaticity coordinates of CA NF CSDRC before and after 30 days of outdoor exposure. (c-f) The comparison of solar reflectance of the CA NF CSDRC before and after 30 days of outdoor exposure.

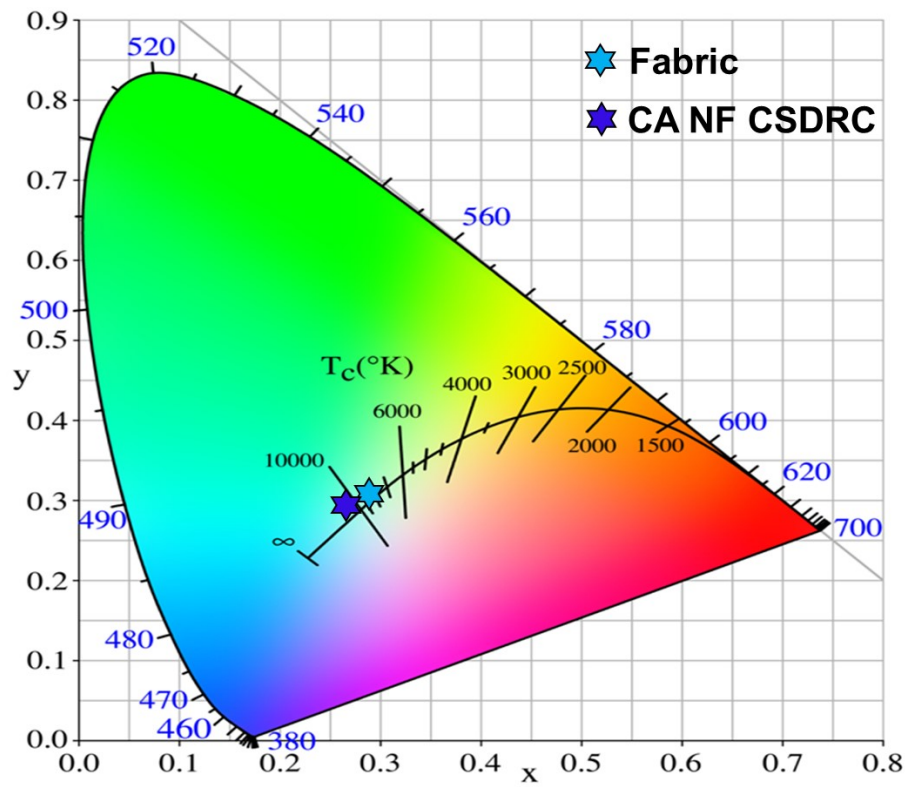

**Fig. S10** The CIE chromaticity coordinates of CA NF CSDRC and fabric.

**Table S1. Color properties of colorful nanofiber coolers**

| Samples      | L     | a*    | b*    |
|--------------|-------|-------|-------|
| Orange CSDRC | 90.20 | 7.65  | 9.82  |
| Pink CSDRC   | 88.78 | 10.01 | -5.03 |
| Yellow CSDRC | 93.79 | 1.14  | 18.72 |
| Blue CSDRC   | 88.49 | -2.09 | -5.73 |

**Table S2.** The reflectivity values of the colored radiator in visible (0.4-0.8  $\mu\text{m}$ ;  $R_{\text{VIS}}$ ) and near infrared wavelengths (0.8-2.5  $\mu\text{m}$ ;  $R_{\text{NIR}}$ ), and the broadband solar reflectance (0.4-2.5  $\mu\text{m}$ ;  $R_{\text{solar}}$ ), as well as the emittance in atmosphere windows (8-13  $\mu\text{m}$ ;  $\epsilon_{\text{AW}}$ ).

| Sample                  | Orange | Pink  | Yellow | Blue  |
|-------------------------|--------|-------|--------|-------|
| Optical property        | CSDRC  | CSDRC | CSDRC  | CSDRC |
| $R_{\text{VIS}}$        | 0.863  | 0.848 | 0.889  | 0.835 |
| $R_{\text{NIR}}$        | 0.963  | 0.971 | 0.970  | 0.989 |
| $R_{\text{solar}}$      | 0.904  | 0.901 | 0.920  | 0.900 |
| $\alpha_{\text{solar}}$ | 0.078  | 0.086 | 0.055  | 0.098 |
| $\epsilon_{\text{AW}}$  | 0.949  | 0.956 | 0.952  | 0.960 |

**Table S3** A summary of information on the types of colored radiative coolers in recent years.

| <b>R<br/>e<br/>f.</b> | <b>Color</b>              | <b>Structure</b>                                                                                                | <b>Materials</b>                                           | <b>Method</b> | <b>Optical properties</b>                                                                                                                     | <b>Passive cooling performance (Power, Temperature and Solar radiation intensity)</b>                                                                                                                                                                                                                  |
|-----------------------|---------------------------|-----------------------------------------------------------------------------------------------------------------|------------------------------------------------------------|---------------|-----------------------------------------------------------------------------------------------------------------------------------------------|--------------------------------------------------------------------------------------------------------------------------------------------------------------------------------------------------------------------------------------------------------------------------------------------------------|
| 1                     | Pink                      | Photonic structure color<br>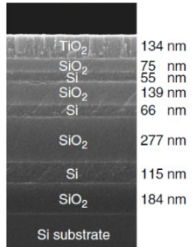   | TiO <sub>2</sub> , SiO <sub>2</sub> , Si                   | 1D stacks     | Broadband<br>$\epsilon_{ir} \sim 0.8$<br>$R_{solar} \sim 0.6$<br>$R_{NIR} \sim 0.8$                                                           | $P_{sun} > 900 \text{ W/m}^2$<br>$P: 99.7 \text{ W/m}^2$<br>$\Delta T: -10 \text{ }^\circ\text{C}$                                                                                                                                                                                                     |
| 2                     | Cyan, magenta, and yellow | Photonic structure color<br> | SiO <sub>2</sub> , Si <sub>3</sub> N <sub>4</sub> , Ag, Si | 1D stacks     | Broadband<br>$\epsilon_{ir} > 0.8$<br>$R_{NIR} > 0.9$                                                                                         | $P_{sun} > 900 \text{ W/m}^2$<br>$\Delta T$ : close to the air                                                                                                                                                                                                                                         |
| 3                     | Yellow, magenta, and cyan | Photonic structure color<br> | SiO <sub>2</sub> , SiN, MgF <sub>2</sub> , SiC, Ag         | 1D stacks     | Broadband<br>$\epsilon_{ir} \sim 0.9$<br>$R_{NIR} \sim 0.9$                                                                                   | $P_{sun} \sim 800-900 \text{ W/m}^2$<br>$P: 44.06 \text{ W/m}^2$ (yellow),<br>$49.06 \text{ W/m}^2$ (magenta),<br>$52.61 \text{ W/m}^2$ (cyan)<br>$\Delta T_{yellow}: 4.2 \text{ }^\circ\text{C}$<br>$\Delta T_{magenta}: 4.6 \text{ }^\circ\text{C}$<br>$\Delta T_{cyan}: 4.9 \text{ }^\circ\text{C}$ |
| 4                     | black/blue/red/yellow     | Bilayer colored paint<br>    | P(VdF-HFP), colorant                                       | Coating       | Broadband<br>$\epsilon_{ir} > 0.95$<br>$R_{NIR} \sim 0.89$<br>$R_{solar}: 0.44$ (black),<br>$0.4$ (blue),<br>$0.61$ (red),<br>$0.72$ (yellow) | $P_{sun} \sim 1000 \text{ W/m}^2$<br>$\Delta T_{black}: -25 \text{ }^\circ\text{C}$ ,<br>$\Delta T_{blue}: -22 \text{ }^\circ\text{C}$ ,<br>$\Delta T_{red}: -15 \text{ }^\circ\text{C}$ ,<br>$\Delta T_{yellow}: -5 \text{ }^\circ\text{C}$                                                           |

|   |                                       |                                                                                                                                                                                                                        |                                                                                 |                                               |                                                                                                                                                                                                                                                                  |                                                                                                                                                                                                                                                                                                                    |
|---|---------------------------------------|------------------------------------------------------------------------------------------------------------------------------------------------------------------------------------------------------------------------|---------------------------------------------------------------------------------|-----------------------------------------------|------------------------------------------------------------------------------------------------------------------------------------------------------------------------------------------------------------------------------------------------------------------|--------------------------------------------------------------------------------------------------------------------------------------------------------------------------------------------------------------------------------------------------------------------------------------------------------------------|
| 5 | White, green and red                  | <p>Four-layer film stack</p> 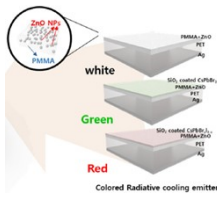                                                                                                         | SiO <sub>2</sub> -embedded perovskite NCs/PMMA+ZnO/PET/Ag                       | Deposition                                    | <p>Broadband<br/> <math>\epsilon_{ir} \geq 0.95</math><br/> <math>R_{NIR} &lt; 0.9</math><br/> <math>R_{solar}: 0.86</math> (white),<br/> <math>0.81</math> (green),<br/> <math>0.78</math> (red)</p>                                                            | <p><math>P_{sun} \sim 900 \text{ W/m}^2</math><br/> <math>\Delta T_{white}: 4.2 \text{ }^\circ\text{C}</math><br/> <math>\Delta T_{green}: 3.6 \text{ }^\circ\text{C}</math><br/> <math>\Delta T_{red}: 1.7 \text{ }^\circ\text{C}</math></p>                                                                      |
| 6 | White, yellow, red, brown             | <p>Bilayer coating:<br/> Top-layer: QDs based color layer<br/> Bottom-layer: H-SiO<sub>2</sub>/polymer nanoparticle white layer</p>  | Cu-based quantum dots, H-SiO <sub>2</sub> /PVDF-HFP (the best), or PMMA, or PVP | Spray coating                                 | <p>Broadband<br/> <math>\epsilon_{ir} = 0.943</math><br/> <math>R_{NIR} &gt; 0.9</math><br/> <math>R_{solar} \approx 0.97</math> (white)<br/> <math>\approx 0.86</math> (yellow)<br/> <math>\approx 0.77</math> (red)<br/> <math>\approx 0.66</math> (brown)</p> | <p><math>P_{sun} \sim 800 \text{ W/m}^2</math><br/> <math>\Delta T_{white}: 6.12 \text{ }^\circ\text{C}</math><br/> <math>\Delta T_{yellow}: 3.25 \text{ }^\circ\text{C}</math><br/> <math>\Delta T_{red}: 0.51 \text{ }^\circ\text{C}</math><br/> <math>\Delta T_{brown}: -3.24 \text{ }^\circ\text{C}</math></p> |
| 7 | Indigo, blue, green, yellow, and pink | <p>Photonic structure color</p>                                                                                                     | SiO <sub>2</sub>                                                                | self-assembly method and reactive ion etching | <p>Broadband<br/> <math>\epsilon_{ir} = 0.95</math><br/> <math>R_{NIR} &gt; 0.9</math><br/> <math>R_{solar} &gt; 0.95</math></p>                                                                                                                                 | <p><math>P: 143 \text{ W/m}^2</math><br/> <math>\Delta T: 7.1 \text{ }^\circ\text{C}</math></p>                                                                                                                                                                                                                    |

**Table S4** Weather Forecast in Shanghai in Nov. 2022

| Date       | T <sub>max</sub> (°C) | T <sub>min</sub> (°C) | Weather                     | Wind Power |
|------------|-----------------------|-----------------------|-----------------------------|------------|
| 2022-11-01 | 20                    | 15                    | Cloudy to overcast          | Breeze     |
| 2022-11-02 | 20                    | 14                    | Sunny                       | Breeze     |
| 2022-11-03 | 21                    | 15                    | Cloudy                      | Breeze     |
| 2022-11-04 | 18                    | 12                    | Cloudy to overcast          | Breeze     |
| 2022-11-05 | 18                    | 12                    | Cloudy to sunny             | Breeze     |
| 2022-11-06 | 19                    | 13                    | Sunny                       | Breeze     |
| 2022-11-07 | 22                    | 14                    | Sunny                       | Breeze     |
| 2022-11-08 | 22                    | 16                    | Sunny to cloudy             | Breeze     |
| 2022-11-09 | 23                    | 17                    | Cloudy to sunny             | Grade 3-4  |
| 2022-11-10 | 23                    | 17                    | Cloudy to overcast          | Breeze     |
| 2022-11-11 | 23                    | 19                    | Light rain                  | Grade 3-4  |
| 2022-11-12 | 26                    | 16                    | Cloudy to light rain        | Grade 3-4  |
| 2022-11-13 | 17                    | 12                    | Overcast to Sunny           | Breeze     |
| 2022-11-14 | 13                    | 10                    | Cloudy to overcast          | Breeze     |
| 2022-11-15 | 17                    | 10                    | Overcast                    | Breeze     |
| 2022-11-16 | 17                    | 13                    | Overcast to light rain      | Grade 3-4  |
| 2022-11-17 | 17                    | 15                    | Light rain turns overcast   | Breeze     |
| 2022-11-18 | 20                    | 16                    | Light rain                  | Breeze     |
| 2022-11-19 | 19                    | 16                    | Light rain                  | Breeze     |
| 2022-11-20 | 19                    | 15                    | Cloudy to sunny             | Breeze     |
| 2022-11-21 | 20                    | 15                    | Cloudy to light rain        | Breeze     |
| 2022-11-22 | 19                    | 13                    | Light rain to cloudy        | Breeze     |
| 2022-11-23 | 18                    | 13                    | Cloudy to sunny             | Breeze     |
| 2022-11-24 | 17                    | 14                    | Cloudy                      | Breeze     |
| 2022-11-25 | 20                    | 13                    | Cloudy to light rain        | Breeze     |
| 2022-11-26 | 19                    | 16                    | Cloudy to overcast          | Grade 3-4  |
| 2022-11-27 | 21                    | 18                    | Light rain to overcast      | Breeze     |
| 2022-11-28 | 21                    | 16                    | Moderate rain to light rain | Grade 4-5  |
| 2022-11-29 | 17                    | 5                     | Light rain                  | Grade 5-6  |
| 2022-11-30 | 6                     | 3                     | Light rain                  | Breeze     |



## Supplementary Note 1 : Calculation of radiative cooling power

The net cooling power ( $P_{net}$ ) of the colored flexible nanofiber cooler can be calculated as follows<sup>8-11</sup>:

$$P_{net} = P_{rad} - P_{atm} - P_{solar} - P_{cond+conv}$$

where  $P_{rad}$  is the energy radiated into space,  $P_{atm}$  is the atmospheric radiative energy absorbed,  $P_{solar}$  is the solar energy absorbed, and  $P_{cond+conv}$  represents the non-radiative parasitic losses.

$$P_{rad} = \pi \int_0^{+\infty} \int_0^{\frac{\pi}{2}} \varepsilon_r(\lambda, \theta) I_b(\lambda, T_{sur}) \sin(2\theta) d\theta d\lambda$$

where  $\varepsilon_r(\lambda, \theta)$  is the spectral emissivity. Here,  $T_{sur}$  represents the surface temperature.

$I_b(\lambda, T_{sur}) \cos(\theta)$  represents the intensity of black-body radiations at  $T_{sur}$ , which is taken

as:  $I_b(\lambda, T_{sur}) = \frac{2hc^2}{\lambda^5} \frac{1}{e^{\frac{hc}{\lambda KT}} - 1}$ , where h, c and k are Planck's constant, speed of light in

vacuum and Boltzmann's constant, respectively.

$$P_{atm} = \pi \int_0^{+\infty} \int_0^{\frac{\pi}{2}} \alpha_r(\lambda, \theta) \varepsilon_{atm}(\lambda, \theta) I_b(\lambda, T_a) \sin(2\theta) d\theta d\lambda$$

Where  $\alpha_r(\lambda, \theta)$  refers to the spectral absorptivity of the cooler and equals to the spectral

directional emissivity  $\varepsilon_r(\lambda, \theta)$  based on Kirchhoff's law of thermal radiation.  $T_a$  is the

ambient temperature. where  $\varepsilon_{atm}(\lambda, \theta)$  is the spectral directional emissivity of the sky

atmosphere, which can be expressed as:

$$\varepsilon_{atm}(\lambda, \theta) = 1 - [\tau(\lambda, \theta)]^{1/\cos(\theta)}$$

where  $(\lambda, \theta)$  represents the atmospheric transmissivity at vertical direction.

$$P_{sun} = \int_0^{+\infty} I_{AM1.5}(\lambda) \alpha_r(\lambda, \theta_{sun}) d\lambda$$

where  $I_{AM1.5}(\lambda)$  is the AM 1.5 spectrum distribution of the solar radiation intensity

varying with the wavelength.

$$P_{cond+conv} = h_{cc} (T_a - T_{sur})$$

$P_{cond+conv}$  is the power density of nonradiative heat exchange due to convection and conduction. The  $h_{cc}$  is a comprehensive heat transfer coefficient. It is closely related to the local wind speed. The dependence of  $h$  on the local wind speed can be qualitatively modeled using a simple empirical expression

$$h_{cc} = 2.5 + 2V_{wind}$$

where  $V_{wind}$  represents the wind speed expressed in m/s. We set  $h_{cc}$  values as 0 W/m<sup>2</sup>, 3 W/m<sup>2</sup>, 6 W/m<sup>2</sup>, and 12 W/m<sup>2</sup>, respectively, to show the impact of different non-radiative heat exchange coefficient on affecting the cooling performance. During Nov. 2022, the average wind speed in Shanghai was around 3-5 m/s (Table S4), suggesting likely  $h_{cc}$  values in the range around 6-12 W/m<sup>2</sup>.

## References

1. W. Li, Y. Shi, Z. Chen and S. Fan, *Nat Commun*, 2018, **9**, 4240.
2. G. J. Lee, Y. J. Kim, H. M. Kim, Y. J. Yoo and Y. M. Song, *Advanced Optical Materials*, 2018, **6**, 1800707.
3. C. Sheng, Y. An, J. Du and X. Li, *ACS Photonics*, 2019, **6**, 2545-2552.
4. J. M. Yijun Chen, Wenxi Li, Ajani Smith-Washington, Cheng-Chia Tsai, Wenlong Huang, Sajan Shrestha, Nanfang Yu, Ray P. S. Han, Anyuan Cao, Yuan Yang, *science advances*, 2020, **6**, eaaz5413.
5. S. Son, S. Jeon, D. Chae, S. Y. Lee, Y. Liu, H. Lim, S. J. Oh and H. Lee, *Nano Energy*, 2021, **79**, 105461.
6. T. Y. Yoon, S. Son, S. Min, D. Chae, H. Y. Woo, J.-Y. Chae, H. Lim, J. Shin, T. Paik and H. Lee, *Materials Today Physics*, 2021, **21**, 100510.
7. Z. Ding, L. Pattelli, H. Xu, W. Sun, X. Li, L. Pan, J. Zhao, C. Wang, X. Zhang, Y. Song, J. Qiu, Y. Li and R. Yang, *Small*, 2022, **18**, e2202400.
8. T. Wang, Y. Wu, L. Shi, X. Hu, M. Chen and L. Wu, *Nat Commun*, 2021, **12**, 365.
9. H. H. Kim, E. Im and S. Lee, *Langmuir : the ACS journal of surfaces and colloids*, 2020, **36**, 6589-6596.
10. A. P. Raman, M. A. Anoma, L. Zhu, E. Rephaeli and S. Fan, *Nature*, 2014, **515**, 540-544.
11. S. Fan and W. Li, *Nature Photonics*, 2022, **16**, 182-190.
